# Supplementary material for: Interventions to Reduce Hospital Length of Stay in High-risk Populations: A Systematic Review
Source: PubMed Central journal article supplement (PMC8453321; doi:10.1001/jamanetworkopen.2021.25846), 2021-09-20
Supplement: jamanetwopen-e2125846-s001.pdf [file jamanetwopen-e2125846-s001.pdf]

## Supplemental Online Content

Siddique SM, Tipton K, Leas B, et al. Interventions to reduce hospital length of stay in high-risk populations: a systematic review. *JAMA Netw Open*. 2021;4(9):e2125846.  
doi:10.1001/jamanetworkopen.2021.25846

**eTable 1.** Embase and MEDLINE Search Terms in Embase Syntax

**eTable 2.** Characteristics of Systematic Reviews on Reducing Length of Hospital Stay

**eTable 3.** Summary of Findings for Length of Stay Meta-analyses

This supplemental material has been provided by the authors to give readers additional information about their work.

**eTable 1.** Embase and MEDLINE Search Terms in Embase Syntax

| Set | Concept                                                    | Strategy                                                                                                                                                                                                                                                                                                                                                                                                                                                                                                                                         |
|-----|------------------------------------------------------------|--------------------------------------------------------------------------------------------------------------------------------------------------------------------------------------------------------------------------------------------------------------------------------------------------------------------------------------------------------------------------------------------------------------------------------------------------------------------------------------------------------------------------------------------------|
| 1   | Length of Stay                                             | 'length of stay'/exp OR ('hospital discharge'/exp AND 'time factor'/exp) OR 'los':ti,ab OR (((length OR duration) NEXT/3 stay):ti,ab) OR 'bed days':ti,ab OR (((length OR duration OR days) NEAR/3 hospital*):ti,ab) OR (((inpatient OR patient OR short) NEAR/1 (stay* OR throughput OR flow* OR days)):ti,ab) OR (((discharge* OR stay) NEAR/4 (delay* OR timely OR timeliness OR fast OR faster OR sooner OR quick* OR haste* OR rapid* OR early OR earlier OR reduc* OR decrease OR lessen OR speed*)):ti,ab) OR ((fast NEXT/1 track):ti,ab) |
| 2   | Population: Frail elderly                                  | 'frail elderly'/exp OR 'aged hospital patient'/exp OR 'very elderly'/exp OR 'dementia'/exp OR frail:ti,ab OR frailty:ti,ab OR dementia*:ti,ab OR alzheimer*:ti,ab OR 'hospital elder life program' OR 'older people assessment liason' OR opal                                                                                                                                                                                                                                                                                                   |
| 3   | Population: Patients experiencing heart failure            | 'heart failure'/exp OR ((heart OR cardio* OR cardiac OR cardiogen* OR coronary) NEAR/3 (failure OR shock OR death OR infarct* OR arrest*)):ti,ab)                                                                                                                                                                                                                                                                                                                                                                                                |
| 4   | Combine sets                                               | 1 AND (2 OR 3)                                                                                                                                                                                                                                                                                                                                                                                                                                                                                                                                   |
| 5   | Limit to English language and human studies                | 4 AND [humans]/lim AND [english]/lim                                                                                                                                                                                                                                                                                                                                                                                                                                                                                                             |
| 6   | Exclude unwanted publication types                         | 5 NOT (abstract:nc OR annual:nc OR book/de OR 'case report'/de OR 'case study'/de OR conference:nc OR 'conference abstract':it OR 'conference paper'/de OR 'conference paper':it OR 'conference proceeding':pt OR 'conference review':it OR congress:nc OR editorial/de OR editorial:it OR erratum/de OR letter:it OR note/de OR note:it OR meeting:nc OR sessions:nc OR 'short survey'/de OR symposium:nc)                                                                                                                                      |
| 7   | Limit to Systematic Reviews                                | 6 AND ('systematic review'/de OR 'meta analysis'/de OR (systematic* NEAR/2 review*) OR metaanalysis OR metaanalyses OR (meta NEXT/1 (analysis OR analyses)) OR Cochrane)                                                                                                                                                                                                                                                                                                                                                                         |
| 8   | Limit to items published between 2010 and January 19, 2021 | 7 AND [01-01-2010]/sd NOT [19-01-2021]                                                                                                                                                                                                                                                                                                                                                                                                                                                                                                           |

\*We updated the prior English-language literature searches conducted through 30 September 2020 by searching MEDLINE and EMBASE (via EMBASE.com), In-Process MEDLINE and PubMed-unique content (via PubMed.gov), and CINAHL for specific patient populations through 19 January 2021. See report for full search strategy (<https://effectivehealthcare.ahrq.gov/products/hospital-length-of-stay>)

**eTable 2.** Characteristics of Systematic Reviews on Reducing Length of Hospital Stay

| Reference                                                                                                                                     | Objective                                                                                                                                                                         | Search Timeframe              | Inclusion/Exclusion Criteria                                                                                                                                                                                                                                                                                                                                                      | Primary Studies: N, Design                                                                            | Age, No. of studies | Primary dx & comorbidity, No. of studies                                                                                                                                                           | GRADE or Similar Analysis                                                                                           |
|-----------------------------------------------------------------------------------------------------------------------------------------------|-----------------------------------------------------------------------------------------------------------------------------------------------------------------------------------|-------------------------------|-----------------------------------------------------------------------------------------------------------------------------------------------------------------------------------------------------------------------------------------------------------------------------------------------------------------------------------------------------------------------------------|-------------------------------------------------------------------------------------------------------|---------------------|----------------------------------------------------------------------------------------------------------------------------------------------------------------------------------------------------|---------------------------------------------------------------------------------------------------------------------|
| <b>Austin et al. 2020 (30)</b>                                                                                                                | Examine which electronic medical record interventions have improved safety and quality of therapeutic anticoagulation in an inpatient hospital setting                            | Inception to September 2018   | <u>Included:</u> Studies published in English with pediatric and adult inpatients; EMR compared to routine care; reporting at least one outcome of interest                                                                                                                                                                                                                       | 27 total studies:<br><br>3 RCTs, 4 cohort studies, 20 pre/post observational studies (N=not reported) | >18 years           | Types of anticoagulants assessed:<br><br>Unfractionated heparin: k=9<br><br>Vitamin K antagonists: k=8<br><br>Combination of anticoagulants: k=8 studies<br><br>Low molecular weight heparins: k=2 | No                                                                                                                  |
| <b>Agarwal et al. 2018 (41)</b><br><br>*Note: Laramie 2003 and Rich 1995a also included in Goncalves-Bradley 2016 and/or Bryant-Lukosius 2015 | Examine the effect and quality of evidence for hospital-based HF quality improvement interventions on process of care measures and clinical outcomes among patients with acute HF | Inception to February 6, 2017 | <u>Included:</u> RCTs or quasi-randomized trials of HF quality improvement interventions testing effect of individual or combined interventions (e.g., audit and feedback reporting systems, admission and discharge checklists, chart case management, patient educational or behavioral change materials, healthcare quality training that was directed at the hospital system, | 14 RCTs (N=96,913) *(N=75,664 for 6 US RCTs) reporting outcomes of interest                           | 67.5 to 79.3 years  | Heart failure                                                                                                                                                                                      | Yes, GRADE (For the most part, outcomes from specific RCTs of interest for this report were not graded separately ) |

| Reference                                                                                                                                                                            | Objective                                                                                                 | Search Timeframe      | Inclusion/Exclusion Criteria                                                                                                                                                                                                                                                                                                 | Primary Studies: N, Design                                                                                               | Age, No. of studies                                                                                                                                                | Primary dx & comorbidity, No. of studies                                                                                    | GRADE or Similar Analysis |
|--------------------------------------------------------------------------------------------------------------------------------------------------------------------------------------|-----------------------------------------------------------------------------------------------------------|-----------------------|------------------------------------------------------------------------------------------------------------------------------------------------------------------------------------------------------------------------------------------------------------------------------------------------------------------------------|--------------------------------------------------------------------------------------------------------------------------|--------------------------------------------------------------------------------------------------------------------------------------------------------------------|-----------------------------------------------------------------------------------------------------------------------------|---------------------------|
|                                                                                                                                                                                      |                                                                                                           |                       | doctors, nurses or allied health professionals or information management systems                                                                                                                                                                                                                                             |                                                                                                                          |                                                                                                                                                                    |                                                                                                                             |                           |
| <b>Baratloo et al. 2018 (31)</b>                                                                                                                                                     | Examine effects of telemedicine on treatment times and clinical outcomes of acute stroke care             | May 2017              | <u>Included:</u> Original prospective and retrospective studies, individuals with AIS, telestroke-based systems, bedside (face to face) care as a comparator, studies investigating outcomes of interest<br><br><u>Excluded:</u> Single-arm studies, studies reporting irrelevant outcomes, conference abstracts             | 26 total studies:<br>2 RCTs,<br>8 prospective observational studies,<br>16 retrospective observational studies (N=6,605) | Mean range: 60.1 to 80 years                                                                                                                                       | Tissue plasminogen activator treated patients with acute ischemic stroke                                                    | No                        |
| <b>Bryant-Lukosius et al. 2015 (42)</b><br><br>*Note: Kennedy 1987, Laramée 2003, Naylor 1994, 1999, and 2004 also included in Gonçalves-Bradley 2016, Zhu 2015, Mabire 2017, and/or | Examine the clinical effectiveness and cost-effectiveness of clinical nurse specialists transitional care | 1980 to July 31, 2013 | <u>Included:</u> Published and unpublished RCTs comparing CNS-led transitional care to usual care. Intervention was delivered by a master's prepared CNS<br><br><u>Excluded:</u> Studies of outcomes that could not be solely attributed to the CNS; the control group was exposed to a CNS; or did not include a measure of | 13 RCTs (N=2,463)                                                                                                        | Patients with heart failure: mean range: 70.7 to 76 years<br><br>Elderly hospitalized patients: mean range: 74.4 to 80.3 years<br><br>High-risk pregnant women and | Patients with heart failure: k=3<br><br>Elderly hospitalized patients: k=5<br><br>High-risk pregnant women and infants: k=3 | Yes, GRADE                |

| Reference                                                                                                 | Objective                                                                                                                                                                                       | Search Timeframe             | Inclusion/Exclusion Criteria                                                                                                                                                                                                                                  | Primary Studies: N, Design                                                     | Age, No. of studies                           | Primary dx & comorbidity, No. of studies                            | GRADE or Similar Analysis                                                                                                                      |
|-----------------------------------------------------------------------------------------------------------|-------------------------------------------------------------------------------------------------------------------------------------------------------------------------------------------------|------------------------------|---------------------------------------------------------------------------------------------------------------------------------------------------------------------------------------------------------------------------------------------------------------|--------------------------------------------------------------------------------|-----------------------------------------------|---------------------------------------------------------------------|------------------------------------------------------------------------------------------------------------------------------------------------|
| Agarwal 2019                                                                                              |                                                                                                                                                                                                 |                              | health system utilization                                                                                                                                                                                                                                     |                                                                                | infants:<br>mean<br>range:<br>23.5 to<br>28.5 |                                                                     |                                                                                                                                                |
| <b>Bakker et al. 2011 (32)</b>                                                                            | Examine effectiveness of geriatric care teams and units                                                                                                                                         | 1980 – May 2009              | <u>Included:</u> RCTs and observational studies; patients at least 65 years old; multicomponent interventions<br><br><u>Excluded:</u> Non-English studies; single-disease or single-component interventions                                                   | 17 total studies;<br><br>6 reported LOS:<br><br>4 RCTs,<br><br>2 observational | 65+ years                                     | Frail elderly                                                       | No                                                                                                                                             |
| <b>Eagles et al. 2020 (48)</b><br><br>Note: Lin 2009 also included in Goncalves-Bradley 2016 and Zhu 2015 | Examine impact of a geriatric assessment on mortality, hospital length of stay, discharge destination, and delirium incidence in patients<br><br>65 years and older admitted to a trauma center | April 26, 2019               | <u>Included:</u> Peer-reviewed studies describing impact of geriatric trauma consultation (GTC) in adults 65 years and older admitted to a trauma center compared with standard trauma care alone<br><br><u>Excluded:</u> Case reports, SRs, and commentaries | 8 retrospective cohort studies (N=122 to 4,534)                                | Range:<br><br>60 to<br><br>70 years           | Older adults admitted to trauma center                              | No formal analysis. Authors reported strength of findings are limited by study design, confounding, meta-analysis results based on few studies |
| <b>Ellis et al. 2017 (43)</b><br><br>Note: Counsell 2000 also included in Mabire 2018                     | Examine effectiveness and resource use of comprehensive geriatric assessment (CGA) for older adults admitted to hospital, and                                                                   | Inception to October 5, 2016 | <u>Included:</u> RCTs comparing inpatient CGA versus usual care on a general medical ward or on a ward for older people, usually admitted to hospital for acute care or for inpatient                                                                         | 29 RCTs (N=13,766)                                                             | Mean range:<br><br>74 to<br><br>85 years      | Frail or at-risk participants: k=11<br><br>Older participants: k=11 | Yes, GRADE                                                                                                                                     |

| Reference                      | Objective                                                                             | Search Timeframe            | Inclusion/Exclusion Criteria                                                                                                                                                                                                                                                                                                                                                                                                                                                                                                                                                                                                 | Primary Studies: N, Design | Age, No. of studies        | Primary dx & comorbidity, No. of studies                                                                                                                                                                | GRADE or Similar Analysis |
|--------------------------------|---------------------------------------------------------------------------------------|-----------------------------|------------------------------------------------------------------------------------------------------------------------------------------------------------------------------------------------------------------------------------------------------------------------------------------------------------------------------------------------------------------------------------------------------------------------------------------------------------------------------------------------------------------------------------------------------------------------------------------------------------------------------|----------------------------|----------------------------|---------------------------------------------------------------------------------------------------------------------------------------------------------------------------------------------------------|---------------------------|
|                                | to use these data to estimate its cost-effectiveness                                  |                             | rehabilitation after an acute admission                                                                                                                                                                                                                                                                                                                                                                                                                                                                                                                                                                                      |                            |                            |                                                                                                                                                                                                         |                           |
| <b>Frazer et al. 2019 (44)</b> | Examine interventions intended to improve safety or quality anticoagulant prescribing | Inception to March 24, 2018 | <p><u>Included:</u> RCTs, non-RCTs, controlled before-after, interrupted time-series in economically developed countries assessing system-level interventions for any indication in adult inpatients aged 18 years or older</p> <p><u>Excluded:</u> Interventions targeting prophylactic (low-dose) anticoagulant use, evaluating intra-operative anticoagulation, delivered in the outpatient setting or at transition to outpatient care, or compared with interventions not in current practice. Cross-sectional, uncontrolled cohort, review articles, unpublished, opinion pieces, conference abstracts/proceedings</p> | 19 RCTs (N=12,742)         | Mean range: 46 to 77 years | History of AF, ACS, VTE, stroke/TIA, valve replacement, severe heart failure, PVD, bridge to lung transplant, valve disease, systemic arterial embolism, left ventricular thrombus, cardiac prophylaxis | No                        |

| Reference                                                                                                                                                                                                                                               | Objective                                                                                   | Search Timeframe     | Inclusion/Exclusion Criteria                                                                                                                                                                                                                                                                                 | Primary Studies: N, Design                                                            | Age, No. of studies                                                               | Primary dx & comorbidity, No. of studies                                                                                                                                                                                                                   | GRADE or Similar Analysis    |
|---------------------------------------------------------------------------------------------------------------------------------------------------------------------------------------------------------------------------------------------------------|---------------------------------------------------------------------------------------------|----------------------|--------------------------------------------------------------------------------------------------------------------------------------------------------------------------------------------------------------------------------------------------------------------------------------------------------------|---------------------------------------------------------------------------------------|-----------------------------------------------------------------------------------|------------------------------------------------------------------------------------------------------------------------------------------------------------------------------------------------------------------------------------------------------------|------------------------------|
| <p><b>Gonçalves-Bradley et al. 2016 (45)</b></p> <p>*Note: Jack 2009, Kennedy 1987, Laramee 2003, Lin 2009, Naylor 1994, Rich 1995a, Weinberger 1996 also included in Bryant-Lukosius 2015, Zhu 2015, Mabire 2017, Agarwal 2019, and/or Eagles 2020</p> | Examine effectiveness of planning the discharge of individual patients moving from hospital | 1946 to October 2015 | <p><u>Included:</u> RCTs; participants were hospital inpatients</p> <p><u>Excluded:</u> Studies of discharge planning part of a broader package of inpatient care, did not describe study design or report control group results</p>                                                                         | 30 RCTs (N=11,964)                                                                    | <p>75 years: k=10</p> <p>70 to</p> <p>75 years: k=7</p> <p>&lt;70 years: k=13</p> | <p>Older participant: k=21</p> <p>Mix of medical and surgical conditions including heart failure: k=5</p> <p>Psychiatric hospital or general ward: k=2</p> <p>Admitted following fall: k=2</p> <p>Note: some trials included multiple population types</p> | GRADE (Moderate to very low) |
| <p><b>Gillaizeau et al. 2013 (33)</b></p>                                                                                                                                                                                                               | Examine effectiveness of computerized advice on drug dosing                                 | Through January 2012 | <p><u>Included:</u> RCTs and observational studies; interventions using computerized advice to guide drug dosing tailored to individual patient</p> <p><u>Excluded:</u> Studies of equations or algorithms not supported by a computerized device; popups or dosing advice that was not patient-specific</p> | <p>42 total studies;</p> <p>9 reported LOS:</p> <p>8 RCTs,</p> <p>1 observational</p> | Not reported                                                                      | Mix includes diabetes, COPD, renal disease, etc.                                                                                                                                                                                                           | Very Low                     |

| Reference                                                                                                                                      | Objective                                                                                                                         | Search Timeframe     | Inclusion/Exclusion Criteria                                                                                                                                                                                                                                                                                                          | Primary Studies: N, Design                                                                                                      | Age, No. of studies | Primary dx & comorbidity, No. of studies                                                                                       | GRADE or Similar Analysis |
|------------------------------------------------------------------------------------------------------------------------------------------------|-----------------------------------------------------------------------------------------------------------------------------------|----------------------|---------------------------------------------------------------------------------------------------------------------------------------------------------------------------------------------------------------------------------------------------------------------------------------------------------------------------------------|---------------------------------------------------------------------------------------------------------------------------------|---------------------|--------------------------------------------------------------------------------------------------------------------------------|---------------------------|
| <b>Huntley et al. 2016 (34)</b>                                                                                                                | Examine effectiveness and cost of case management for patients with heart failure                                                 | 1985 – November 2015 | <u>Included:</u> RCTs and observational studies; adult studies only; all languages                                                                                                                                                                                                                                                    | 22 total studies;<br>9 reported LOS:<br>8 RCTs,<br>1 observational;<br>13 reported readmissions:<br>12 RCTs,<br>1 observational | 65+ years           | Congestive heart failure                                                                                                       | No                        |
| <b>Kul et al. 2012 (35)</b>                                                                                                                    | Examine effectiveness of clinical pathways for patients with heart failure                                                        | 1985 – 2011          | <u>Included:</u> RCTs and observational studies; all languages                                                                                                                                                                                                                                                                        | 7 total studies:<br>3 RCTs, 1 cohort,<br>3 pre-post                                                                             | Mean:<br>>65 years  | Congestive heart failure                                                                                                       | No                        |
| <b>Mabire et al 2017 (36, 37)</b><br><br>Note: Counsell 2000 also included in Eliis 2017 and Naylor 2004 also included in Bryant-Lukosius 2015 | Examine effectiveness of nursing discharge planning interventions on health-related outcomes for older inpatients discharged home | 2000 to 2015         | <u>Included:</u> Studies published in English of older patients<br><br>(≥65 years) discharged home from an acute care or post-acute care rehabilitation setting,<br><br>i.e., skilled nursing facility. Interventions had to be provided by at least one nurse and involve a multidisciplinary and/or interdisciplinary model of care | 13 total studies:<br><br>11 RCTs, 1 pilot cohort,<br>1 pre-post study (N=3,964)                                                 | Median:<br>77 years | Older patients:<br><br>With severe comorbidities: k=1<br><br>With moderate comorbidities: k=5<br><br>With low morbidities: k=5 | Yes, GRADE                |



| Reference                                                                                          | Objective                                                                                                                                                                                            | Search Timeframe                        | Inclusion/Exclusion Criteria                                                                                                                                                                                                                                                                                                                                                                                                                                                                          | Primary Studies: N, Design                                                                                           | Age, No. of studies | Primary dx & comorbidity, No. of studies                                                                                                             | GRADE or Similar Analysis                                                                                                            |
|----------------------------------------------------------------------------------------------------|------------------------------------------------------------------------------------------------------------------------------------------------------------------------------------------------------|-----------------------------------------|-------------------------------------------------------------------------------------------------------------------------------------------------------------------------------------------------------------------------------------------------------------------------------------------------------------------------------------------------------------------------------------------------------------------------------------------------------------------------------------------------------|----------------------------------------------------------------------------------------------------------------------|---------------------|------------------------------------------------------------------------------------------------------------------------------------------------------|--------------------------------------------------------------------------------------------------------------------------------------|
| <b>Patel et al. 2020 (38)</b><br><br>Note: Weingerber 1996 also included in Goncalves-Bradley 2016 | Examine treatment of geriatric hip fractures by a multidisciplinary hip fracture service and what impact this has on patient outcomes                                                                | January 1, 2012 to November 12, 2017    | <u>Included:</u> Indexed in the databases searched, full-text comparative studies published in English that studied at least one of the four main outcome measures of interest<br><br><u>Excluded:</u> Patients <18 years in intensive care unit, operating rooms, stroke units, coronary care, pharmacotherapy; interventions relying solely on a staff member taking dedicated coordinating or facilitating role (e.g., case management); interventions targeting continuation of care by a similar | 17 total studies:<br>9 retrospective studies,<br>6 prospective studies, 1 RCT,<br>1 non-RCT (N=146 to 23,973)        | >60 years           | Older patients with hip fracture                                                                                                                     | Tool used not reported: 16 of<br><br>17 studies receive an evidence grade of good, 1 of<br><br>17 received an evidence grade of fair |
| <b>Pannick et al. 2015 (39)</b>                                                                    | Examine the range of objective patient outcomes used in studies of general medical ward interdisciplinary team care, and to evaluate the performance of interdisciplinary interventions against them | January 1, 1998<br><br>January 29, 2014 | <u>Included:</u> Primary reports of interdisciplinary team care interventions in adult general medical wards using an objective patient outcome measure<br><br><u>Excluded:</u> Patients <18 years in intensive care unit, operating rooms, stroke units, coronary care, pharmacotherapy; interventions relying solely on a staff member taking dedicated coordinating or facilitating role (e.g., case management); interventions targeting continuation of care by a similar                        | 30 total studies:<br>8 RCTs, 9 cluster-RCTs, 8 non-RCT cluster, 4 before-after, 1 interrupted time series (N=66,548) | Mean: 63 years      | Variety of primary diagnoses: delirium, community-acquired pneumonia, acute stroke, advanced liver disease, patients taking anticoagulant medication | No                                                                                                                                   |

| Reference                                                                                                                                          | Objective                                                                                                                         | Search Timeframe       | Inclusion/Exclusion Criteria                                                                                                                                                                                                        | Primary Studies: N, Design                                                                                                          | Age, No. of studies                 | Primary dx & comorbidity, No. of studies                                                                                                 | GRADE or Similar Analysis |
|----------------------------------------------------------------------------------------------------------------------------------------------------|-----------------------------------------------------------------------------------------------------------------------------------|------------------------|-------------------------------------------------------------------------------------------------------------------------------------------------------------------------------------------------------------------------------------|-------------------------------------------------------------------------------------------------------------------------------------|-------------------------------------|------------------------------------------------------------------------------------------------------------------------------------------|---------------------------|
|                                                                                                                                                    |                                                                                                                                   |                        | group during the following shift<br><br>(e.g., handoff processes)                                                                                                                                                                   |                                                                                                                                     |                                     |                                                                                                                                          |                           |
| <b>Van Craen et al. 2010 (46)</b>                                                                                                                  | Examine effectiveness of geriatric evaluation units                                                                               | Through October 2007   | <u>Included:</u> RCTs and cohort studies; patients at least 65 years old; published in English, French, or Dutch<br><br><u>Excluded:</u> Studies of single-disease management programs and geriatric consultation services          | 7 RCTs                                                                                                                              | 65+ years                           | Frail elderly                                                                                                                            | No                        |
| <b>White et al. 2011 (40)</b>                                                                                                                      | Examine the effectiveness of hospitalists on the quality of inpatient care                                                        | 1996 – December 2010   | <u>Included:</u> All study designs, ages, languages                                                                                                                                                                                 | 65 total studies;<br><br>1 RCT, 8 non-randomized controlled trials,<br><br>1 interrupted time series, 37 cohort,<br><br>18 pre-post | All ages                            | Mix includes heart failure, COPD, psychiatric illness, substance use disorder, etc.                                                      | No                        |
| <b>Zhu et al. 2015 (20)</b><br><br>Note: Jack 2009, Lin 2009, and Naylor 1999 also included in Goncalves-Bradley 2016, Eagles 2020, and/or Bryant- | Examine effectiveness of nurse-led early discharge planning program (DPP) to standard care for inpatients with chronic disease or | 1946 to March 29, 2014 | <u>Included:</u> RCTs; general hospital setting; include at least one primary or secondary outcome<br><br><u>Excluded:</u> Non-English studies, assessing patients with acute, critical illness, or social admissions; programs was | 10 RCTs (N=3,438)                                                                                                                   | Mean range:<br><br>36.4 to 94 years | Older hospitalized adults: k=5<br><br>Decompensated HF: k=1<br><br>Hip fracture patients: k=1<br><br>Rehab patients: k=1<br><br>CHD: k=1 | No                        |

| Reference                     | Objective                                                                                    | Search Timeframe  | Inclusion/Exclusion Criteria                                                                                                                                                                                                                                                                       | Primary Studies: N, Design                                                                                     | Age, No. of studies | Primary dx & comorbidity, No. of studies    | GRADE or Similar Analysis |
|-------------------------------|----------------------------------------------------------------------------------------------|-------------------|----------------------------------------------------------------------------------------------------------------------------------------------------------------------------------------------------------------------------------------------------------------------------------------------------|----------------------------------------------------------------------------------------------------------------|---------------------|---------------------------------------------|---------------------------|
| Lukosius 2015                 | rehabilitation needs                                                                         |                   | directed by non-nursing staff; assessing post-discharge care of patients transferred to nursing home or long-term care facility; intervention initiated at discharge; post-discharge care                                                                                                          |                                                                                                                |                     | Hospitalized psychiatric patients: k=1      |                           |
| <b>Zhang et al. 2013 (47)</b> | Examine effectiveness of interventions to prevent postoperative delirium in elderly patients | Through July 2012 | <u>Included:</u> RCTs only; adult patients<br><br><u>Excluded:</u> Non-English studies; patients with delirium prior to surgery; non-surgical patients; patients with alcohol withdrawal syndrome; studies of homogenous populations of patients with central nervous diseases or mental disorders | 38 total RCTs;<br><br>10 studies reported LOS, only 2 used a systemic intervention (others were pharmacologic) | Mean age: 80+ years | Frail elderly undergoing orthopedic surgery | No                        |

ACS: acute coronary syndrome; AF: atrial fibrillation; AIS: acute ischemic stroke; ARDS: acute respiratory distress syndrome; CGA: comprehensive geriatric assessment; CHD: congenital heart disease; CNS: clinical nurse specialists; COPD: chronic obstructive pulmonary disease; EMR: electronic medical record; GRADE: Grading of Recommendations Assessment, Development and Evaluation; GTC: geriatric trauma consultation; HF: heart failure; LOS: length of stay; PVD: peripheral vascular disease; RCT: randomized controlled trial; TIA: transient ischemic attack; US: United States; VTE: venous thromboembolism

**eTable 3.** Summary of Findings for Length of Stay Meta-analyses

| Type of Intervention      | Reference                          | Comparison                                                  | Population                                                                                                                                 | Study Design: No. Studies (N)                          | Findings and Direction of Effect                                                                         | Strength of Evidence |
|---------------------------|------------------------------------|-------------------------------------------------------------|--------------------------------------------------------------------------------------------------------------------------------------------|--------------------------------------------------------|----------------------------------------------------------------------------------------------------------|----------------------|
| <b>Discharge planning</b> | Mabire et al. 2017 (36, 37)        | Nursing discharge planning interventions vs. usual care     | Older patients with or without comorbidities                                                                                               | 4 RCTs, 1 pre-post, and 1 cohort (3 of 6 US) (n=2,370) | WMD: 0.29 days, 95% CI: 0.24 to 0.35, I <sup>2</sup> =0%, intervention increases LOS                     | Low                  |
| <b>Discharge planning</b> | Goncalves-Bradley et al. 2016 (45) | Discharge planning vs. usual care                           | Older patients with a medical condition                                                                                                    | 12 RCTs (6 of 12 US) (n=2,193)                         | MD: -0.73 days, 95% CI: -1.33 to -0.12, I <sup>2</sup> =9.44%, favors intervention                       | Moderate             |
| <b>Discharge planning</b> | Goncalves-Bradley et al. 2016 (45) | Discharge planning vs. usual care                           | Older surgical patients                                                                                                                    | 2 RCTs (1 of 2 US) (n=184)                             | MD: -0.06, 95% CI: -1.23 to 1.11, I <sup>2</sup> =0%, no difference                                      | Very Low             |
| <b>Discharge planning</b> | Bryant-Lukosius et al. 2015 (42)   | Clinical nurse specialists transitional care vs. usual care | Elderly hospitalized patients                                                                                                              | 3 US RCTs (n=396)                                      | MD: -0.69 days, 95% CI: -1.95 to 0.56, p=0.28, no difference                                             | Low                  |
| <b>Discharge planning</b> | Bryant-Lukosius et al. 2015 (42)   | Clinical nurse specialists transitional care vs. usual care | High-risk pregnant women                                                                                                                   | 2 US RCTs (n=215)                                      | MD: -1.19 days, 95% CI: -1.55 to -0.83, p<0.00001, favors intervention (reduces maternal postpartum LOS) | Moderate             |
| <b>Discharge planning</b> | Zhu et al. 2015 (20)               | Nurse-led early discharge planning vs. usual care           | Mix includes older patients, decompensated heart failure, hip fracture, rehab, congestive heart disease, hospitalized psychiatric patients | 5 RCTs (4 of 5 US) (n=1,912)                           | SMD: 0.03, 95% CI: -0.06 to 0.12, p=0.540, I <sup>2</sup> =0%, no difference in LOS                      | Moderate             |

| Type of Intervention          | Reference                   | Comparison                                                 | Population                                                                                         | Study Design: No. Studies (N)                                                | Findings and Direction of Effect                                                                                                  | Strength of Evidence |
|-------------------------------|-----------------------------|------------------------------------------------------------|----------------------------------------------------------------------------------------------------|------------------------------------------------------------------------------|-----------------------------------------------------------------------------------------------------------------------------------|----------------------|
| <b>Geriatric assessment</b>   | Eagles et al. 2020 (48)     | Geriatric trauma consultation vs. usual trauma care        | Older adults admitted to trauma center                                                             | 2 US retrospective cohort studies (n=5,414)                                  | MD: -1.11 days, 95% CI: -1.43 to -0.79, I <sup>2</sup> =0%, favors intervention                                                   | Moderate             |
| <b>Geriatric assessment</b>   | Van Craen et al. 2010 (46)  | Geriatric evaluation unit vs. usual care                   | Frail elderly                                                                                      | 7 RCTs (n=4,759)                                                             | Mean reduction measured by Hedges g 0.07 days, 95% CI: -0.11 to 0.26, no difference                                               | High*                |
| <b>Medication management</b>  | Gillaizeau et al. 2013 (33) | Computerized decision support vs. usual care               | Mix includes diabetes, COPD, renal disease, etc.                                                   | 8 RCTs and 1 observational study (n=18,507)                                  | SMD: -0.15, 95% CI: -0.33 to 0.02, I <sup>2</sup> =57%, no difference in reduction of LOS, but leans toward favoring intervention | Very Low*            |
| <b>Clinical pathways</b>      | Kul et al. 2012 (35)        | Clinical pathways vs. usual care                           | Congestive heart failure                                                                           | 1 RCT and 4 observational studies (n=2,095)                                  | Mean reduction: 1.89 days, 95% CI: 1.33 to 2.44, I <sup>2</sup> =42%, favors intervention                                         | Low*                 |
| <b>Interdisciplinary care</b> | Pannick et al. 2015 (39)    | Altering interdisciplinary team composition vs. usual care | Mixed patient population – geriatric, liver transplant, psychiatric, delirium, infectious diseases | 2 RCTs, 2 non-RCT cluster studies, 2 before/after studies (4 of 6 US) (n=NR) | WMD: 0.087 days, 95% CI: -0.083 to 0.257, no difference                                                                           | Low*                 |
| <b>Interdisciplinary care</b> | Pannick et al. 2015 (39)    | Altering interdisciplinary team practice vs. usual care    | Most studies did not specify patient population, 1 study include geriatric patients and 1          | 2 cluster RCTs, 3 non RCT cluster studies, 2 interrupted time series (6 of   | WMD: 0.001 days, 95% CI: -0.035 to 0.037, no difference                                                                           | Low*                 |

| Type of Intervention   | Reference                 | Comparison                                          | Population                                                               | Study Design: No. Studies (N)                                                                     | Findings and Direction of Effect                                                                                                                                                                                                                  | Strength of Evidence |
|------------------------|---------------------------|-----------------------------------------------------|--------------------------------------------------------------------------|---------------------------------------------------------------------------------------------------|---------------------------------------------------------------------------------------------------------------------------------------------------------------------------------------------------------------------------------------------------|----------------------|
|                        |                           |                                                     | study's setting<br>VA hospital                                           | 7 US)<br>(n=NR)                                                                                   |                                                                                                                                                                                                                                                   |                      |
| <b>Case management</b> | Huntley et al. 2016 (34)  | Case management vs. usual care                      | Congestive heart failure                                                 | 8 RCTs and 1 observational study (n=1,765)                                                        | Mean reduction: 1.28 days, 95% CI: 0.52 to 2.04, I <sup>2</sup> =63%, favors intervention<br>Subgroup analysis, excluding studies at high risk of bias: Mean reduction: 1.76 days, 95% CI: 1.23 to 2.29, I <sup>2</sup> =14%, favors intervention | Moderate*            |
| <b>Telehealth</b>      | Baratloo et al. 2018 (31) | Telestroke-based systems vs. bedside (face-to-face) | Tissue plasminogen activator treated patients with acute ischemic stroke | 6 retrospective controlled studies, 2 prospective controlled studies, 1 RCT (6 of 9 US) (n=2,850) | MD: -0.55 days, 95% CI: -1.02 to -0.07, p=0.02, I <sup>2</sup> =38%, favors intervention                                                                                                                                                          | Low*                 |

LOS: length of stay; CI: confidence interval; COPD: chronic obstructive pulmonary disease; MD: mean difference; NR: not reported; OR: odds ratio; RCT: randomized controlled trial; RR: risk ratio; US: United States; VA: Veteran Affairs; WMD: weighted mean difference

\*Authors of SRs did not assess the strength of evidence for this outcome. Strength of evidence rating is based on guidance from Berkman et al. 2013 (29).
